# Supplementary material for: Critical stresses in mechanochemical reactions
Source: Royal Society of Chemistry journal article supplement (doi:10.1039/d2sc04000j), 2022-01-01
Supplement: d2sc04000j1.pdf [file d2sc04000j1.pdf]

## Supplemental Information

### Critical Stresses in Mechanochemical Reactions

Resham Rana,<sup>1</sup> Nicholas Hopper,<sup>1</sup> François Sidoroff,<sup>2</sup> and Wilfred T. Tysoe<sup>1</sup> \*

<sup>1</sup> *Department of Chemistry and Biochemistry, University of Wisconsin-Milwaukee, Milwaukee, WI 53211, USA*

<sup>2</sup> *Laboratoire de Tribologie et Dynamique des Systèmes, CNRS UMR5513, Ecole Centrale de Lyon, F-69134 Ecully cedex, France*

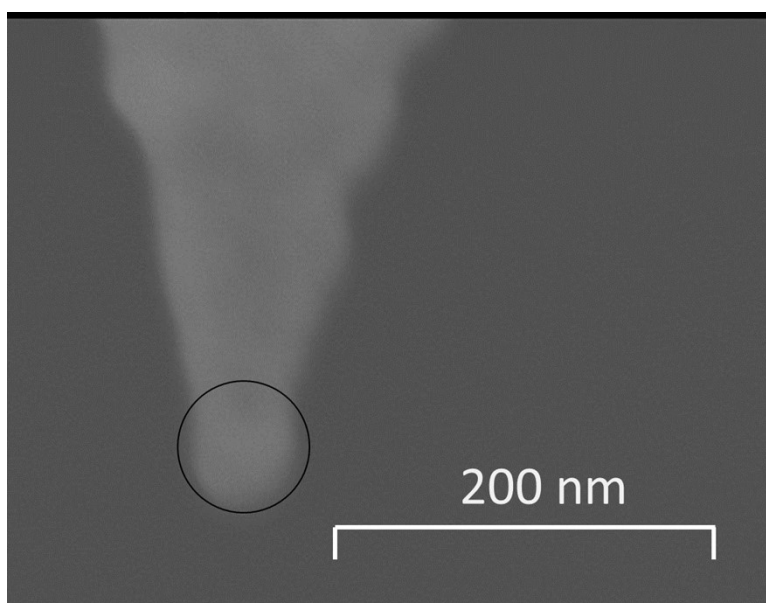

**Figure S1:** Electron microscope image of the AFM tip after wearing in and collecting data on the rate of stress-induced reactions in alkyl thiolates on Cu(100), which yields a tip radius  $R = 35 \pm 3$  nm, which is larger than the nominal radius of  $\sim 8$  nm, due to a running in of the tip during the mechanochemical reactions. Note, however, that the end of the tip maintains a spherical shape.

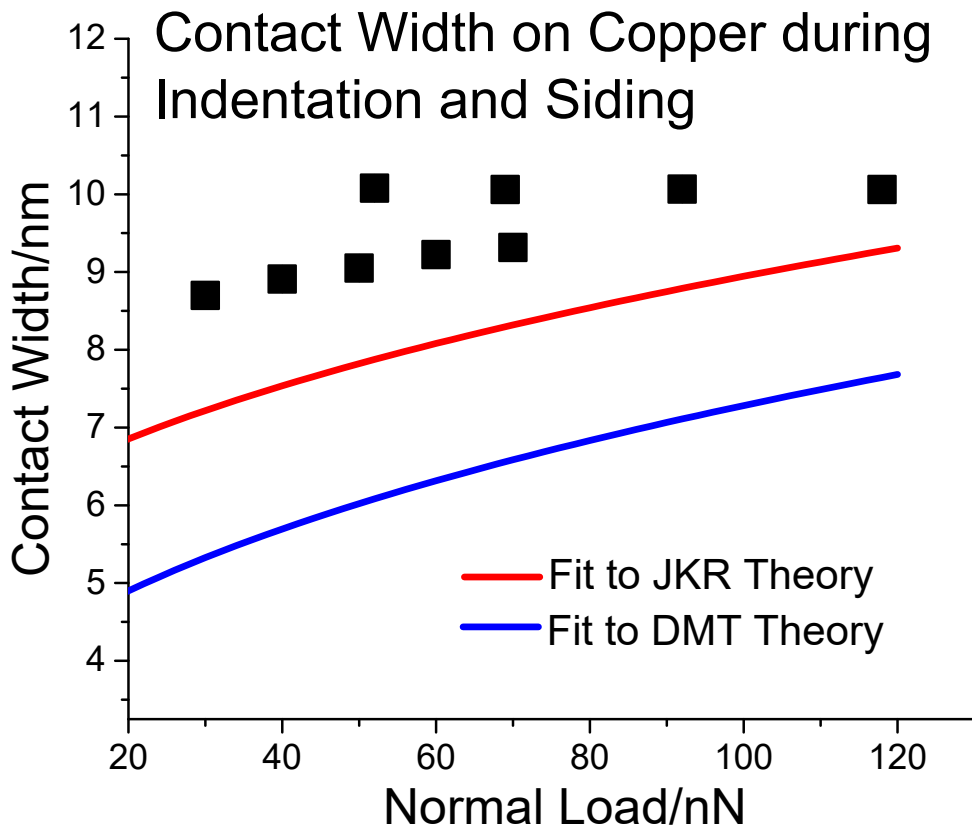

**Figure S2:** Plot of the contact widths measured either for indentation of the tip on the surface to make an indent<sup>1</sup> or from the width of the wear track during rubbing in the experiments performed here (■). It was shown previously that the shape of the indent was that expected for a Hertzian stress distribution where the depth of the indent was proportional to the stress-accelerated reaction rate as calculated using Bell theory.<sup>2</sup> The results were compared with the results predicted for a ball-on-flat geometry using a Young's modulus for copper of 100 GPa<sup>3</sup> with a Poisson ratio of 0.34,<sup>4</sup> and a Young's modulus of silicon of 125 GPa<sup>5,6</sup> and a Poisson ratio of 0.265 to yield a value of  $E^* = 70.2$  GPa. The contact area versus load was calculated using an average pull-off force of ~12 nN using JKR (—) and DMT (—) theory<sup>7</sup> and the results are shown plotted along with the experimental data. Corrections to take into account the presence of an alkyl thiolate overlayer had no significant effect on the results.

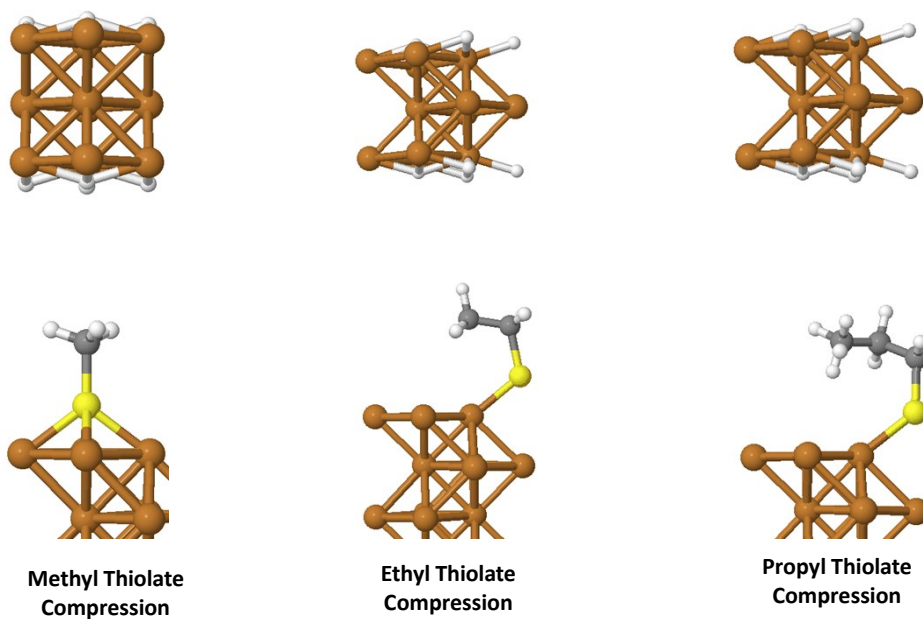

**Figure S3:** Movies of the evolution in the structures of methyl, ethyl and propyl thiolate compressed by Cu(100) slabs as the slabs are brought closer together.

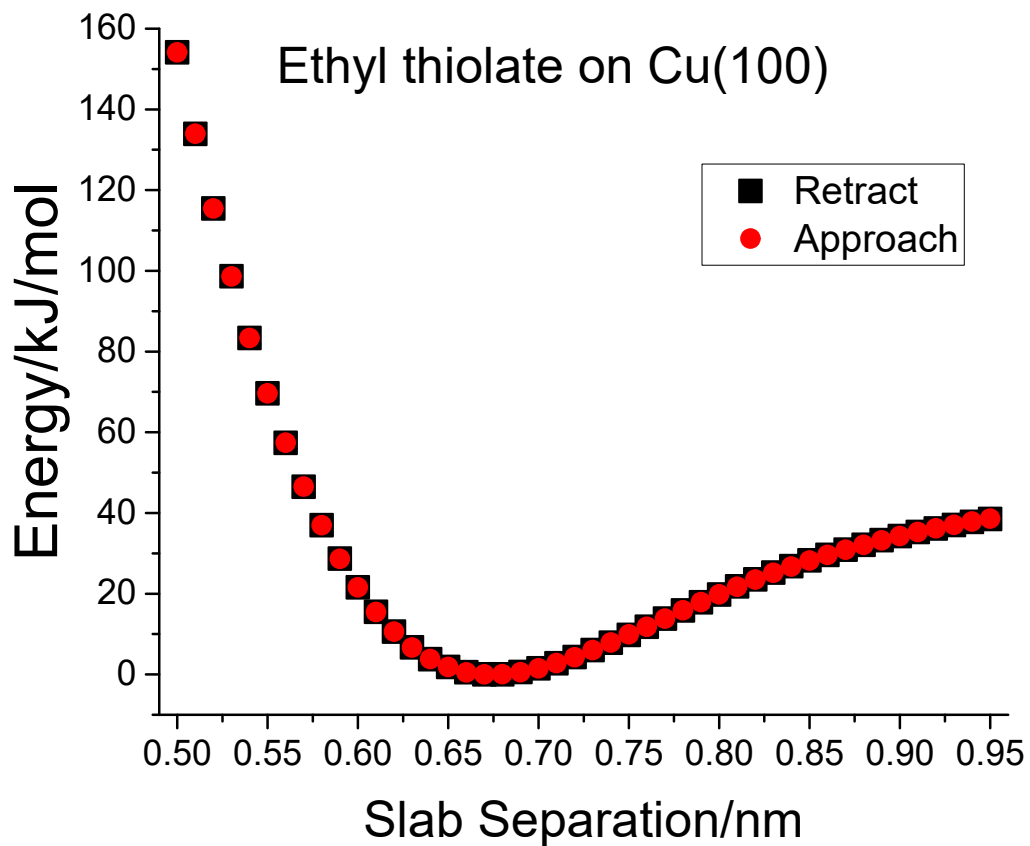

**Figure S4:** Plot of the energy versus slab separation for the compression of an ethyl thiolate species on Cu(100) as a function of the distance from a hydrogen-atom-covered Cu(100) surface for the approach (●) and retraction (■) of the two slabs. The lack of structural changes associated with the approach and retraction of the slabs is shown in Movie S3.

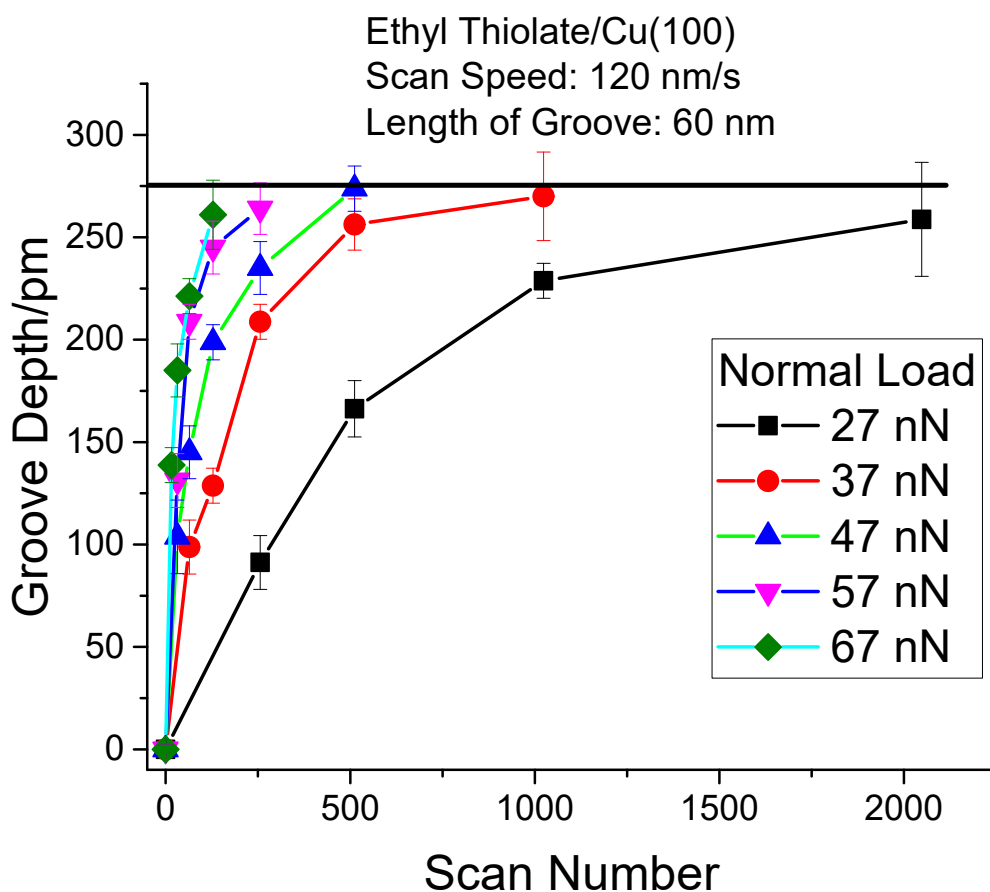

**Figure S5:** Plot of the depth of the wear track as a function of the number of passes over an ethyl thiolate saturated Cu(100) surface showing an exponential increase in the depth of the wear track, indicative of first-order reaction kinetics. The maximum depth for all mechanochemical reactions is  $\sim 275$  pm, which agrees well with the calculated thickness of a methyl thiolate films.

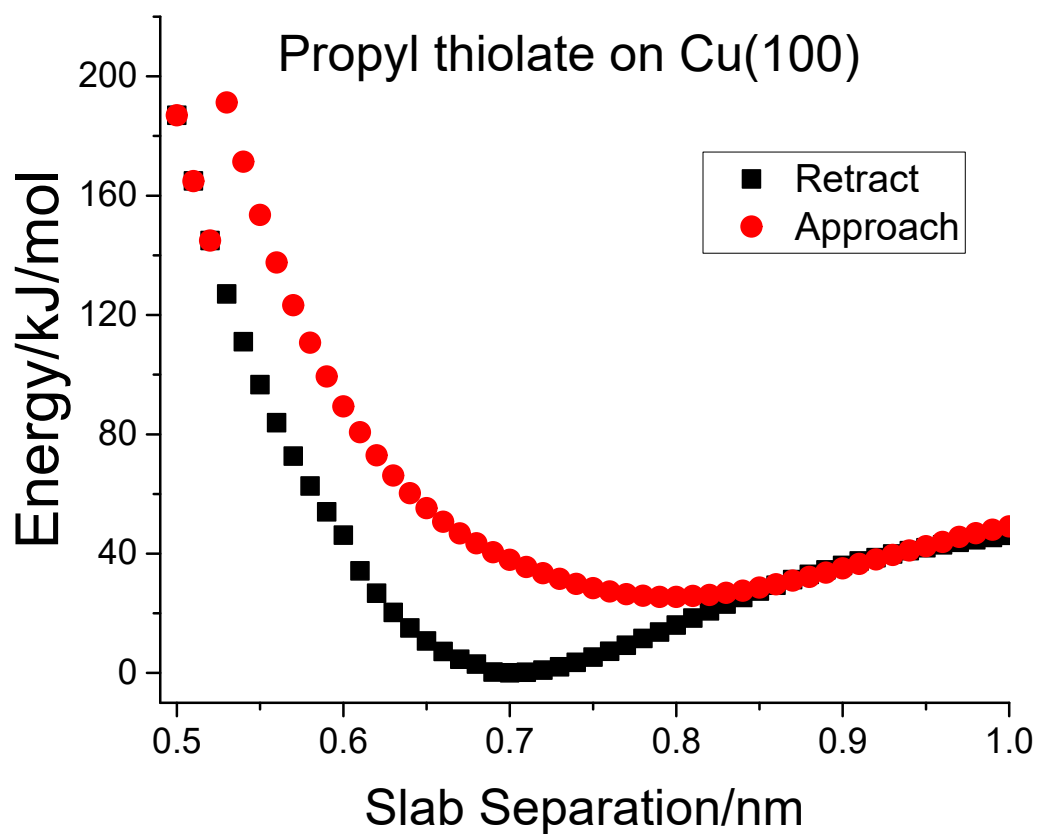

**Figure S6:** Plot of the energy versus slab separation for the compression of a propyl thiolate species on Cu(100) as a function of the distance from a hydrogen-atom-covered Cu(100) surface the approach (●) and retraction (■) of the two slabs. The structural changes associated with the approach and retraction of the slabs is shown in Movie S3.

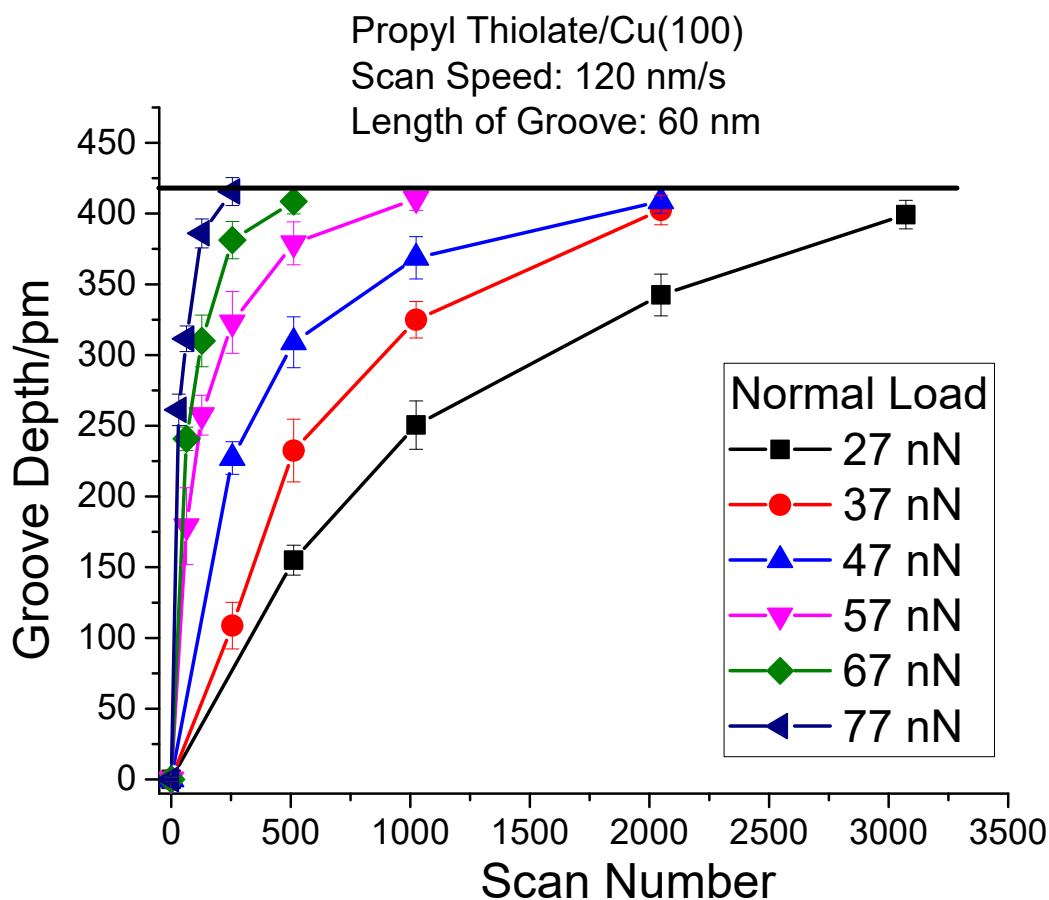

**Figure S5:** Plot of the depth of the wear track as a function of the number of passes over a propyl thiolate saturated Cu(100) surface showing an exponential increase in the depth of the wear track, indicative of first-order reaction kinetics. The maximum depth for all mechanochemical reactions is  $\sim 420$  pm, which agrees well with the calculated thickness of a methyl thiolate films.

## References

1. A. Boscoboinik, D. Olson, H. Adams, N. Hopper and W. T. Tysoe, *Chemical Communications*, 2020, **56**, 7730-7733.
2. G. Bell, *Science*, 1978, **200**, 618-627.
3. R. Rana, D. Long, P. Kotula, Y. Xu, D. Olson, J. Galipaud, T. LeMogne and W. T. Tysoe, *ACS Applied Materials & Interfaces*, 2021, **13**, 6785-6794.
4. H. M. Ledbetter and E. R. Naimon, *Journal of Physical and Chemical Reference Data*, 1974, **3**, 897-935.
5. B. Bhushan and X. Li, *J. Mater. Res.*, 1997, **12**, 54-63.
6. L. Gan, B. Ben-Nissan and A. Ben-David, *Thin Solid Films*, 1996, **290-291**, 362-366.
7. K. L. Johnson, *Contact mechanics*, Cambridge University Press, Cambridge, 1985
