# Supplementary figures and images for: Critical stresses in mechanochemical reactions
Source: Royal Society of Chemistry journal article supplement (doi:10.1039/d2sc04000j), 2022-01-01

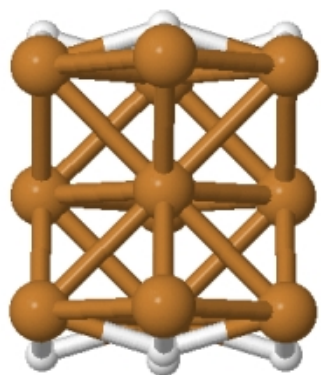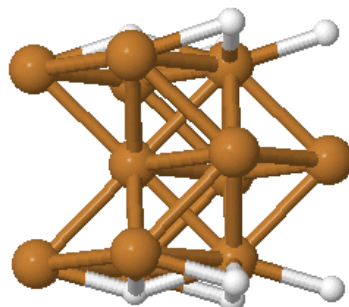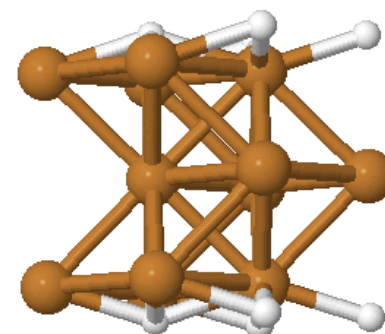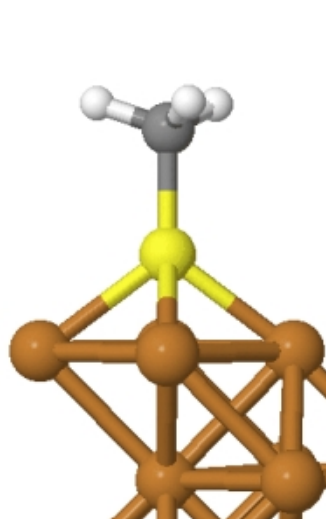

**Methyl Thiolate  
Compression**

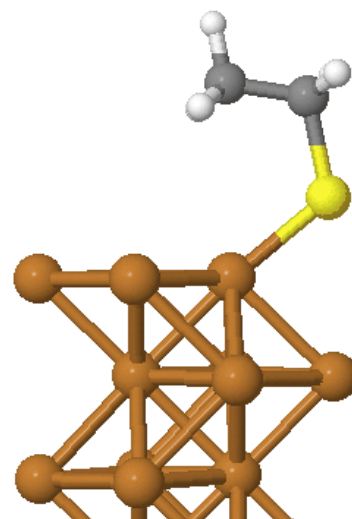

**Ethyl Thiolate  
Compression**

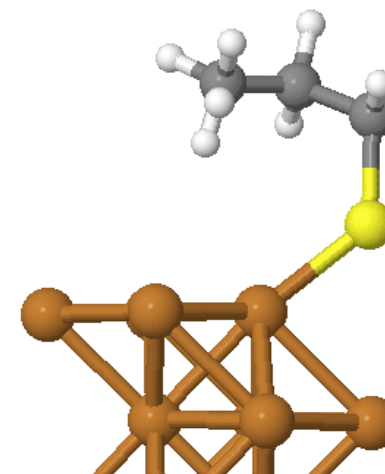

**Propyl Thiolate  
Compression**

Supplement: d2sc04000j2.pdf [file d2sc04000j2.pdf]
